1 **Epidemiological, virological and serological investigation into a SARS-CoV-2 outbreak**  
2 **(Alpha variant) in a primary school: a prospective longitudinal study**

3 **Authors:**

4 Elsa Lorthe<sup>1a</sup>, Mathilde Bellon<sup>2,3a</sup>, Grégoire Michielin<sup>4</sup>, Julie Berthelot<sup>1</sup>, María-Eugenia  
5 Zaballa<sup>1</sup>, Francesco Pennacchio<sup>1</sup>, Meriem Bekliz<sup>2</sup>, Florian Laubscher<sup>5</sup>, Fatemeh Arefi<sup>4</sup>, Javier  
6 Perez-Saez<sup>1,6</sup>, Andrew S Azman<sup>1,6,7</sup>, Arnaud G L'Huillier<sup>5,8</sup>, Klara M Posfay-Barbe<sup>8</sup>, Laurent  
7 Kaiser<sup>3,9</sup>, Idris Guessous<sup>10,11</sup>, Sebastian Maerkl<sup>4</sup>, Isabella Eckerle<sup>2,3,5,9b</sup>, Silvia Stringhini<sup>1,11,12b</sup>;  
8 on behalf of the SEROCov-Schools Study Group

9 <sup>a</sup> Elsa Lorthe and Mathilde Bellon contributed equally to this manuscript.

10 <sup>b</sup> Isabella Eckerle and Silvia Stringhini contributed equally to this manuscript.

11 **Affiliations:**

12 <sup>1</sup> Unit of Population Epidemiology, Division of Primary Care Medicine, Geneva University  
13 Hospitals, Geneva, Switzerland.

14 <sup>2</sup> Department of Microbiology and Molecular Medicine, Faculty of Medicine, University of  
15 Geneva, Geneva, Switzerland.

16 <sup>3</sup> Center for Emerging Viral Diseases, Geneva University Hospitals and University of Geneva,  
17 Geneva, Switzerland.

18 <sup>4</sup> Institute of Bioengineering, School of Engineering, École Polytechnique Fédérale de  
19 Lausanne, Lausanne, Switzerland.

20 <sup>5</sup> Laboratory of Virology, Department of Diagnostics, Geneva University Hospitals, Geneva,  
21 Switzerland.

22 <sup>6</sup> Department of Epidemiology, Johns Hopkins Bloomberg School of Public Health, Baltimore,  
23 USA.

24 <sup>7</sup> Institute of Global Health, Faculty of Medicine, University of Geneva, Geneva, Switzerland;

25 <sup>8</sup> Department of Pediatrics, Gynecology & Obstetrics, Pediatric Infectious Disease Unit,  
26 Geneva University Hospitals and Faculty of Medicine, Geneva, Switzerland.

27 <sup>9</sup> Division of Infectious Diseases, Department of Medicine, Geneva University Hospitals,  
28 Geneva, Switzerland.

29 <sup>10</sup> Division of Primary Care, Geneva University Hospitals, Geneva, Switzerland.

30 <sup>11</sup> Department of Health and Community Medicine, Faculty of Medicine, University of Geneva,  
31 Geneva, Switzerland.

32 <sup>12</sup> University Center for General Medicine and Public Health, University of Lausanne,  
33 Lausanne, Switzerland.

34

35 **Running title:** Alpha variant SARS-CoV-2 school outbreak

36 **Corresponding author information:** Dr Elsa Lorthe, Unit of Population Epidemiology,  
37 Chemin Thury 3B, 1206 Geneva, Switzerland. [elsa.lorthe@gmail.com](mailto:elsa.lorthe@gmail.com), +4122 305 58 61

38

39

40

41

42

43

44 **ORCID:**  
45 Elsa Lorthe 0000-0002-9654-8104  
46 Mathilde Bellon 0000-0001-5308-6053  
47 Grégoire Michielin 0000-0002-6809-9612  
48 María-Eugenia Zaballa 0000-0002-0613-9519  
49 Francesco Pennacchio 0000-0003-4967-7242  
50 Meriem Bekliz 0000-0003-3186-1877  
51 Javier Perez-Saez 0000-0003-3909-2048  
52 Andrew Azman 0000-0001-8662-9077  
53 Arnaud L'Huillier 0000-0001-9230-7285  
54 Klara M Posfay-Barbe 0000-0001-9464-5704  
55 Sebastian Maerkl 0000-0003-1917-5268  
56 Isabella Eckerle 0000-0002-4850-7172  
57 Silvia Stringhini 0000-0002-4387-8943

58

59

60

61

62

63

64

65

66

67

68

69

70

71

72

73

74

75

76

77

78

79 **Abstract**

80 We report a prospective epidemiological, virological and serological investigation of a SARS-  
81 CoV-2 outbreak in a primary school, as part of a longitudinal, prospective, primary school-  
82 based surveillance study. It involved repeated testing of pupils and teachers and household  
83 members of participants who tested positive, with rapid antigen tests and/or RT-PCR (Day 0-2  
84 and Day 5-7), serologies on dried capillary blood samples (Day 0-2 and Day 30), contact tracing  
85 interviews and SARS-CoV-2 whole genome sequencing. This SARS-CoV-2 outbreak caused  
86 by the Alpha variant involved 20 children aged 4 to 6 years from 4 classes, 2 teachers and a  
87 total of 4 household members. Infection attack rates were between 11.8 and 62.0% among  
88 pupils from the 4 classes, 22.2% among teachers and 0% among non-teaching staff. Secondary  
89 attack rate among household members was 15.4%. Symptoms were reported by 63% of infected  
90 children, 100% of teachers and 50% of household members. All analysed sequences but one  
91 showed 100% identity. Serological tests detected 8 seroconversions unidentified by SARS-  
92 CoV-2 virological tests. This study confirmed child-to-child and child-to-adult transmission of  
93 the infection. Effective measures to limit transmission in schools have the potential to reduce  
94 the overall community circulation.

95 **Keywords:** SARS-CoV-2; outbreak; primary school; Alpha variant; serology; household  
96 transmission

97 **Conflict of interest statement:** The authors have no conflict of interest in relation with this  
98 article.

99 **Funding:** The SEROCOv-Schools study was supported by the Federal Office of Public Health,  
100 the Private Foundation of the Geneva University Hospitals, the Fondation des Grangettes, the  
101 Center for Emerging Viral Diseases, and a SNF NRP (National Research Program) 78 Covid-  
102 19 Grant 198412 (to S.J.M., I.E.).

## 103 **Background**

104 Children play an important role in the transmission of many respiratory viral diseases, including  
105 beta-coronaviruses and influenza virus, both within schools [1] and within households [2,3].  
106 This has led most countries worldwide to implement school closures as an important component  
107 of severe acute respiratory syndrome coronavirus 2 (SARS-CoV-2) transmission mitigation  
108 policies from the very beginning of the pandemic [4].

109 Young children commonly have fewer and milder symptoms of SARS-CoV-2 infection than  
110 adults, with a high proportion of asymptomatic infections, and are less likely to experience  
111 severe COVID-19 [5]. However, epidemiological and biological data suggest that, when  
112 infected, children may transmit as much as adults, as children achieve viral loads comparable,  
113 or only minimally lower, to those of adults at the time of diagnosis [6–10].

114 At school, young children have many prolonged close contacts with peers and adults in indoor  
115 setting [11], usually do not wear masks, and in many countries they are not systematically tested  
116 when symptomatic, including in Switzerland [12]. These circumstances make children and  
117 schools a potential strong contributor of the overall community SARS-CoV-2 transmission  
118 [13]. Yet, almost two years into the pandemic, the extent to which young children are infected  
119 and transmit SARS-CoV-2 in school settings remains controversial [5,14], in particular with  
120 variants of concern. Evidence on transmission direction (adult-to-child, child-to-child, child-to-  
121 adult) is also lacking.

## 122 **Outbreak detection**

123 This outbreak investigation is part of a longitudinal, prospective, observational surveillance  
124 study (SEROCoV-Schools), which aims to describe the transmission dynamics of SARS-CoV-  
125 2 infection within primary schools and early childhood education centres, and the risk of  
126 introduction of SARS-CoV-2 into the children's households. The study started in March 2021.

127 Participants had a baseline assessment which included SARS-CoV-2 serology from a capillary  
128 blood test, an antigen rapid diagnostic test (RDT) from an oropharyngeal swab sample, and the  
129 completion of an online questionnaire. Then, a surveillance phase started, with weekly  
130 questionnaires and self-declarations (anytime outside of the weekly questionnaires) allowing  
131 participants to report COVID-19-like symptoms, contact with a positive case or the diagnosis  
132 of a SARS-CoV-2 infection. An outbreak investigation was triggered when a positive case was  
133 diagnosed from a positive real-time reverse transcription polymerase chain reaction (RT-PCR),  
134 which was the case in spring 2021.

135 In this study, we report the findings of a prospective epidemiological, virological and  
136 serological investigation of a SARS-CoV-2 outbreak in a primary school.

## 137 **Methods**

### 138 *Study design and study population*

139 The study population consisted of children and school staff in classes with a positive case as  
140 well as household members of the confirmed cases. School staff included teachers (including  
141 assistants) and non-teaching staff (administrative, cleaners, catering). Children absent from  
142 school for the 2 weeks preceding this outbreak were considered as non-exposed and not  
143 included in the analysis.

144 This prospective outbreak investigation involved repeated virological and serological testing of  
145 the participants. The date of diagnosis of the first positive case in a class was referred to as Day  
146 0 for that class. RDT and/or RT-PCR were performed at Day 0-2 and Day 5-7. Serologies were  
147 performed at Day 0-2 and Day 30.

### 148 *Epidemiological investigation*

#### 149 Case definition

150 Cases were defined according to laboratory results: confirmed SARS-CoV-2-infected cases  
151 were those with positive SARS-CoV-2 RDT and/or RT-PCR results, and/or a seroconversion  
152 between D0-2 and D30 (from seronegative to seropositive according to the test-specific cut-off,  
153 unrelated to vaccination). Confirmed cases could be further classified as symptomatic or  
154 asymptomatic.

#### 155 Other definitions

156 Infection attack rates (IAR) were defined as the proportion of all participating children and  
157 school staff with a positive RDT and/or RT-PCR, and/or a seroconversion. Household  
158 secondary attack rates (SAR) were defined as the proportion of household members who tested  
159 positive by RDT and/or RT-PCR result or who seroconverted, in households with one positive  
160 RDT and/or RT-PCR participant enrolled in the study. Adults were defined as individuals  $\geq 18$   
161 years, whereas children were defined as individuals  $< 18$  years of age. Plausible directions of  
162 transmission were determined, when possible, on the basis of symptom onset and testing dates.

#### 163 Contact tracing

164 Positive cases (or their parents in the case of children) were interviewed using a structured  
165 questionnaire investigating symptoms, contact with a positive person, school attendance,  
166 extracurricular activities, play dates/birthday parties, family/friend gatherings and best friends,  
167 in the 14 days prior to diagnosis.

#### 168 *Laboratory investigation*

#### 169 Virological testing

170 SARS-CoV-2 testing was performed on oropharyngeal swabs taken by nurses or medical  
171 doctors of the study team. Children who were not attending school on the testing days were  
172 tested by their paediatrician or at a testing centre and communicated the results to our team.

173 Depending on the visit, we performed RT-PCR or RDT tests. We used the Panbio COVID-19  
174 Ag rapid test (Abbott) which has been validated in adults for use with oropharyngeal instead of  
175 nasopharyngeal swabs [15]. All oropharyngeal swab samples used for the RDT were tested a  
176 second time from the same swab by RT-PCR to confirm the result (in-house SARS-CoV-2 RT-  
177 qPCR or Cobas® SARS-CoV-2 Test, Cobas 6800, Roche, Switzerland). SARS-CoV-2 whole  
178 genome sequencing was performed for positive samples at the Health 2030 Genome Center  
179 (Geneva) using the Illumina COVIDSeq library preparation reagents following the protocol  
180 provided by the supplier.

### 181 Serological testing

182 We collected capillary blood on a Neoteryx Mitra® collection device, and tested for anti-Spike-  
183 SARS-CoV-2 IgG on a microfluidic nanoimmunoassay as described previously [16].

### 184 *Ethics*

185 This study was approved by the ethics committee of the Canton of Geneva (Project ID 2020-  
186 02957). All parents and teachers were informed about the study and gave written consent while  
187 children gave verbal consent to participate.

### 188 *Role of the funding sources*

189 The funders of the study had no role in the study design, data collection, data analysis, data  
190 interpretation, or writing of this manuscript.

## 191 **Results**

### 192 *Outbreak description, epidemiological and serological investigation*

193 The first COVID-19 case (triggering case: Teacher 1 [T1], Class 1) was diagnosed by RT-PCR  
194 in spring 2021, 3 days after the onset of symptoms. The second teacher in Class 1 (T2) had

195 symptoms onset one day after T1 with an initially negative RT-PCR two days later followed by  
196 a positive RT-PCR two more days later (Figure 1).

197 All 21 children from Class 1, aged 4 years old, were tested the day after T1's positive test. The  
198 IAR was 62% (13/21): 1 child had a positive RDT confirmed by a RT-PCR (Kid 1 [K1]); 5  
199 children had a negative RDT, but subsequent RT-PCR testing on the same swab samples came  
200 back positive (K2, K3, K8, K11, K12); 2 children absent from school because symptomatic  
201 were tested by healthcare providers outside the study setting, both had a positive RT-PCR (K4,  
202 K5); 1 child had a positive RT-PCR at the second visit at D7 (K10); and 4 children  
203 seroconverted between the first and the last visit at D30 (K13, K14, K15, K16) despite negative  
204 swab virological tests at D1 and D7 (Table 1, Figures 1, 2 & 3).

205 Children in another class from the same grade (Class 2) were identified as having close contacts  
206 with children of Class 1 during breaks and specific activities. Class 2 was therefore tested two  
207 days after the tests in Class 1. Of the 19 children aged 4 years old, 17 were tested by RT-PCR,  
208 of whom 2 (K6, K7) tested positive (IAR 11.8%), and 2 did not participate in the outbreak  
209 investigation (they both had only a negative RT-PCR performed externally at D8). No  
210 additional case was identified at subsequent visits. We also repeatedly tested 4 teachers and 2  
211 non-teaching staff in contact with Classes 1 and 2, none of whom was diagnosed with a SARS-  
212 CoV-2 infection (Table 1).

213 The sibling of a positive case from Class 1, attending Class 3 in the same school, tested positive  
214 five days after his/her sibling (K9), triggering the testing protocol in Class 3. All 17 6-years old  
215 tested in Class 3 had a negative RT-PCR at D2, and 16/16 had a negative RDT at D9  
216 (subsequently confirmed with a RT-PCR). Serological tests at D30 revealed 2 additional  
217 seroconversions (K17, K20, of whom one was not tested at D2 of the outbreak but  
218 seroconverted since baseline at the end of March 2021) (IAR 16.7%). In the other class from  
219 the same grade, Class 4, tested at the same time because of close and regular contacts with Class



220 3, 15/15 had a negative RT-PCR at D2, 13/13 had a negative RDT at D9, and 2 additional cases  
221 of seroconversion (K18, K19) were identified (IAR 13.3%); 2 children in the class did not take  
222 part in the study (Table 1, Figure 1). Among 3 teachers and 11 non-teaching staff, none tested  
223 positive.

224 Transmission occurred in 3 out of 10 investigated households of participants with a positive  
225 SARS-CoV-2 test, leading to a secondary attack rate among household members of 4/26  
226 (15.4%). Three members of the same household refused to participate in this investigation, two  
227 of whom were vaccinated. Secondary attack rates were 1/2 (50.0%) with an adult index case,  
228 and 3/24 (12.5%) with a child index case. A teacher spent a few days at his/her parents' place  
229 while having symptoms, his/her parent then developed symptoms and tested positive (adult  
230 household member [HA17]). The parent (HA5) of a positive child from Class 1 tested negative  
231 twice, though he/she seroconverted (Figure 1, Figure 2). He/she reported no contacts outside  
232 his/her household, strictly followed all recommendations, and was not vaccinated between the  
233 two blood draws. Finally, in the family of two children from Classes 1 and 3 who tested positive  
234 one after the other, a parent (HA1) who initially tested negative by RT-PCR, tested positive  
235 after quarantine with his/her children.

236 Among the 15 cases with a positive SARS-CoV-2 test, 3/3 (100%) adults and 9/12 (69%)  
237 children reported symptoms either before or after the positive test, and 3 children were  
238 asymptomatic. Among the 8 children who seroconverted without a positive RDT or RT-PCR  
239 test, 3 were symptomatic, 4 were asymptomatic, and one did not provide symptom information.  
240 Overall, 12/19 (63%) infected children reported symptoms. No severe form of COVID-19  
241 (requiring hospitalization) was reported, and all cases recovered well.

242 *Contact tracing analysis*

243 The two infected teachers live alone and reported no contact with a positive or symptomatic  
244 case in their private life or activities, during the 14 days prior to infection. Their presumed  
245 source of infection was school, as several children from Class 1 were coughing during the week  
246 of April 19. The two infected parents were likely infected by their children, as they reported no  
247 contact outside the household.

248 Three social activities outside the school setting occurred in the two weeks before the triggering  
249 case was diagnosed: the first one (8 days before the triggering case, outdoors) brought together  
250 6 children from Class 1 of whom 5 subsequently tested positive and 3 kids from another school  
251 (not included in the study); the second one (5 days before the triggering case, both indoors and  
252 outdoors) gathered 4 children from Class 1 and Class 2 of whom 3 tested positive (the other  
253 one had antibodies at baseline and at Visit 1); the last one (2 days before the triggering case,  
254 outdoors) was attended by 2 kids from Class 1 and 2 kids from another school (not included in  
255 the study), 1 tested positive at the 2nd visit.

#### 256 *Virological investigation*

257 We conducted whole genome sequencing on samples from the 15 participants who tested  
258 positive for SARS-CoV-2. Coverage of three isolate genomes (HA1, K9 and K10) were  
259 insufficient for any comparisons due to low viral load in the specimen (32%, 20% and 16%  
260 coverage only, respectively). The other sequenced genomes belonged to the Alpha variant. The  
261 virus sequence of K12 differed from the others in one region covered. Here, in position 15824-  
262 15827 a deletion and one addition that restores the reading frame was observed, resulting in a  
263 total of 4 nucleotides difference compared to the other sequences. All 9 sequences with >99%  
264 coverage shared 100% identity between genomes in comparison to the reference sequence  
265 (Figure 3). Virus specimens that could only be partially sequenced retrieved the same sequence  
266 without additional mutations in the regions covered.

## 267 **Preventive measures and outbreak control measures**

268 During the period of this outbreak investigation, non-pharmaceutical public health measures in  
269 Geneva were gradually relaxed, with restaurants and bars opening their outdoor spaces and  
270 entertainment venues opening their indoor spaces.

271 Mitigation of the coronavirus disease (COVID-19) pandemic in Switzerland included school  
272 closures during the first wave from March to May 2020. Thereafter, priority was given to  
273 keeping schools open with several types of preventive measures in place which varied widely  
274 across institutions. In the investigated school, measures in place during the outbreak included  
275 checking children's temperature every morning, sending children home if they had fever or  
276 sickness beyond very mild symptoms, restricted access for parents and requiring all adults to  
277 wear facemasks.

278 During the outbreak, classes 1 and 2 were placed in quarantine by local health authorities for  
279 10 days, starting 4 days after the triggering case. Classes 3 and 4 were not placed in quarantine.

## 280 **Discussion**

281 This is the first investigation of a SARS-CoV-2 outbreak caused by the Alpha variant in a  
282 primary school. It involved 20 children from 4 classes, 2 teachers and 4 household members  
283 (of whom one was also attending one of the participating classes). The index case could not be  
284 formally identified, but it is likely that this outbreak was only identified a week after it started  
285 when a teacher tested positive and triggered the investigation. Of note, children in this age group  
286 were not routinely tested by the official testing recommendations in Switzerland when  
287 symptomatic [12]. This prospective classroom-based study provides evidence of SARS-CoV-2  
288 circulation among young children, school teachers, and introduction into households.

289 Since at least 9 positive cases of this outbreak shared viruses with identical sequence, we  
290 conclude that they are part of the same cluster. This could have been either by simultaneous

291 infection through the same source, or transmission chains between affected individuals. One  
292 divergent virus sequence was found in one of the positive children, which could be either a *de*  
293 *novo* mutation occurring during the outbreak, or constitute independent introductions into the  
294 school, with one leading to this cluster. It cannot be ruled out that, by coincidence, several  
295 infection events with viruses sharing the same sequence were introduced from the community  
296 independently into the school. However, this hypothesis seems less likely given the number of  
297 cases involved, the epidemiological link and time frame, and the limited period of potentially  
298 other exposures before the quarantine decision. Overall community circulation at the cantonal  
299 level was also relatively low at the time (weekly incidence: about 200 cases/100,000  
300 inhabitants), while the Alpha variant was causing 92% of new SARS-CoV-2 infections in  
301 Geneva [17].

302 Other main insights are as follows. First, viral circulation of the Alpha variant in young children  
303 aged 4-6 years old was high, with a majority of unspecific and mild symptomatic infections,  
304 which might explain relatively high secondary attack rates [13]. The observed cluster probably  
305 started in one class and spread to two other classes, most likely through direct child-to-child  
306 contacts and interactions as per our epidemiological investigation, although there could be non-  
307 sampled child or adult intermediaries. We identified two seroconversions in a fourth class, but  
308 with no identification of SARS-CoV-2 virus, thereby limiting the conclusions on transmission  
309 linked to the other classes.

310 Second, child-to-parent transmission occurred in two different households, and child-to-teacher  
311 transmission is probable, which supports previous findings [18,19]. Of note, vaccination was  
312 opened to all persons aged 45 years or older from April 12, and to all people in the 16-44 age  
313 group from May 19. Therefore, only a minority of adults (1 household member and 1 non-  
314 teaching staff) were vaccinated at the beginning of the outbreak. Child-to-adult transmission  
315 seems to depend on the duration of contacts, as no infection was identified among non-teaching

316 staff who spent only limited periods of time (meals) with children. This is contrary to previous  
317 findings [20], and may be explained by the young age of our participants and their behaviour  
318 involving physical proximity with their teachers [21].

319 Third, social activities outside the school could have contributed to the spread of the infection,  
320 as previously reported [22]. However, they could also reflect the bonding between children and  
321 a closer contact at school, thus facilitating transmission.

322 Fourth, we evidenced low sensitivity of RDTs with an oropharyngeal specimen for identifying  
323 both symptomatic and asymptomatic infected children, which confirms previous results  
324 showing that only children with high viral load are identified by such tests [23,24]. We conclude  
325 that RDTs with an oropharyngeal specimen are not the most appropriate for surveillance and/or  
326 outbreak investigation purposes. Analysis of joint RT-PCR/serological data shows that there is  
327 a substantial under-detection of infections in young children, even with RT-PCR testing,  
328 although the optimal time point for viral testing might have been missed in the fixed testing  
329 scheme of this study. Under-detection of acutely infected children might be an explanation for  
330 the discrepancy between official numbers of infected children [25], and studies on virus  
331 prevalence and seroprevalence in school settings [26–30].

### 332 *Strengths and limitations*

333 Few large SARS-CoV-2 outbreaks in young children in school settings have been documented  
334 so far [31,32], even fewer involved an investigation of variants of concern. As part of an  
335 ongoing prospective study, this investigation started less than 24 hours after the first case was  
336 laboratory-confirmed and involved the use of three complementary approaches. We followed  
337 up and repeatedly tested all contacts within four classes regardless of symptoms. Repeated  
338 serological tests proved useful to retrieve seroconversions following asymptomatic or  
339 undiagnosed infections. However, we relied on a limited number of cases. Not all children and

340 adults were tested, which could lead to underestimating IAR and SAR. We might have missed  
341 infections among adults who were vaccinated between D0-2 and D30, as we could not  
342 distinguish between antibodies due to vaccination and those due to infection. Also, we could  
343 not test the household members of cases only detected by seroconversion at D30 with no  
344 positive RT-PCR/RDT, leading to a potential underestimation of secondary attack rates. The  
345 study was performed before the circulation of the more infectious Delta variant; estimates are  
346 therefore likely to be underestimated in a context of Delta dominance [33].

### 347 **Conclusion**

348 This prospective school-based study provides evidence of SARS-CoV-2 transmission among  
349 young children and school teachers and introduction into households. Epidemiological  
350 investigation confirmed child-to-child and child-to-adult direction of transmission of the  
351 infection. Children may be a significant source of extra-household infections and have the  
352 potential to play a role in community transmission, potentially even more so with the more  
353 contagious Delta variant. With most of the adult and adolescent population vaccinated, children  
354 could act as disease reservoirs. Effective strategies are needed to limit transmission in school  
355 settings and vaccination of school staff, and children when available, should be encouraged.

356

357

358

359

360

361

362

363 **Contributors**

364 SS, IE, ALH, KPB, AA, EL, MBel and IG contributed to the conceptualisation of the study.  
365 EL, JB, MEZ, FP, SS and MBel participated in the project management and implementation.  
366 EL performed all contact-tracing interviews. GM, FA and SM analysed all serologies. MBel,  
367 MBek, FL, LK and IE performed and interpreted all virological analyses. GM, JPS, MBel and  
368 IE did the figures and visualisations. EL and MBel verified the data. All authors had full access  
369 to all the data in the study, participated in the interpretation of the results, and accept  
370 responsibility to submit for publication. EL wrote the first draft, and all other authors reviewed  
371 the manuscript. The SEROCov-Schools Study Group contributed to the project  
372 implementation.

373 **Data sharing statement:** Our data are accessible to researchers upon reasonable request for  
374 data sharing to Silvia Stringhini.

375 **Acknowledgements:** We are very grateful to the children and teachers participating in the  
376 SEROCov-Schools study and their families. We would like to thank the school staff for their  
377 responsiveness and support during the outbreak investigation. The authors also would like to  
378 thank the members of the Unit of Population Epidemiology for their daily support in all the  
379 tasks required by the SEROCov-School study.

380 **SEROCov-Schools Study Group:**

381 Elsa Lorthé, Julie Berthelot, Maria-Eugenia Zaballa, H  l  ne Baysson, Andrea Jutta Loizeau,  
382 Ania Wisniak, St  phanie Testini, Khadija Samir, Natalie Francioli, Severine Harnal, Javier  
383 Perez-Saez, Nick Pullen, Francesco Pennacchio, Julien Lamour, Ga  lle Bryand-Rumley, Claire  
384 Semaani, Viviane Richard, Roxane Dumont, Prune Collombet, Natacha No  l, Patrick Bleich,  
385 Nacira El Merjani, Caroline Pugin, Jessica Rizzo, Marion Frangville, Antoine Bal, Fanny-  
386 Blanche Lombard, Zo Francia Randrianandrasana, Oumar Aly Ba, Chantal Martinez, Paola

387 D'Ippolito, Camille Tible, Viola Bucolli, Livia Boehm, Adrien Jos Rastello, Lucie Ménard,  
388 Lison Beigbeder, Frédéric Rinaldi, Alain Cudet, Alexandre Moulin, Andrew S Azman, Arnaud  
389 G L'Huillier, Klara M Posfay-Barbe, Idris Guessous, Silvia Stringhini, Grégoire Michielin,  
390 Sebastian Maerkl, Fatemeh Arefi, Mathilde Bellon, Isabella Eckerle, Laurent Kaiser, Benjamin  
391 Meyer, Meriem Bekliz, Florian Laubscher, Francisco Perez Rodriguez, Pascale Sattonnet-  
392 Roche, Catia Alvarez, Kenneth Adea, Manel Essaidi-Laziosi, Gil Barbosa Monteiro

393

394

395

396

397

398

399

400

401

402

403

404

405

406

407



408 **References:**

- 409 1. Marchbanks TL, Bhattarai A, Fagan RP, Ostroff S, Sodha SV, Moll ME, et al. An Outbreak  
410 of 2009 Pandemic Influenza A (H1N1) Virus Infection in an Elementary School in  
411 Pennsylvania. *Clin Infect Dis*. 2011;52(Suppl 1):S154-60.
- 412 2. Cauchemez S, Donnelly CA, Reed C, Ghani AC, Fraser C, Kent CK, et al. Household  
413 Transmission of 2009 Pandemic Influenza A (H1N1) Virus in the United States. *New*  
414 *England Journal of Medicine*. 2009;361(27):2619-27.
- 415 3. Monto AS, DeJonge PM, Callear AP, Bazzi LA, Capriola SB, Malosh RE, et al.  
416 Coronavirus Occurrence and Transmission Over 8 Years in the HIVE Cohort of Households  
417 in Michigan. *J Infect Dis*. 2020;222(1):9-16.
- 418 4. Viner RM, Russell SJ, Croker H, Packer J, Ward J, Stansfield C, et al. School closure and  
419 management practices during coronavirus outbreaks including COVID-19: a rapid  
420 systematic review. *Lancet Child Adolesc Health*. 2020;4(5):397-404.
- 421 5. Wiedenmann M, Goutaki M, Keiser O, Stringhini S, Tanner M, Low N. The role of children  
422 and adolescents in the SARS-CoV-2 pandemic: a rapid review. *Swiss Medical Weekly*.  
423 2021;151:w30058.
- 424 6. Zhu Y, Bloxham CJ, Hulme KD, Sinclair JE, Tong ZWM, Steele LE, et al. A Meta-analysis  
425 on the Role of Children in Severe Acute Respiratory Syndrome Coronavirus 2 in Household  
426 Transmission Clusters. *Clinical Infectious Diseases*. 2021;72(12):e1146-53.
- 427 7. Jones TC, Biele G, Mühlemann B, Veith T, Schneider J, Beheim-Schwarzbach J, et al.  
428 Estimating infectiousness throughout SARS-CoV-2 infection course. *Science*.  
429 2021;373(6551):eabi5273.
- 430 8. Baggio S, L'Huillier AG, Yerly S, Bellon M, Wagner N, Rohr M, et al. SARS-CoV-2 viral  
431 load in the upper respiratory tract of children and adults with early acute COVID-19. *Clin*  
432 *Infect Dis*. 2020;ciaa1157.
- 433 9. L'Huillier AG, Torriani G, Pigny F, Kaiser L, Eckerle I. Culture-Competent SARS-CoV-2  
434 in Nasopharynx of Symptomatic Neonates, Children, and Adolescents. *Emerg Infect Dis*.  
435 2020;26(10):2494-7.
- 436 10. Bellon M, Baggio S, Bausch FJ, Spechbach H, Salamun J, Genecand C, et al. SARS-CoV-  
437 2 viral load kinetics in symptomatic children, adolescents and adults. *Clin Infect Dis*.  
438 2021;ciab396.
- 439 11. Stehlé J, Voirin N, Barrat A, Cattuto C, Isella L, Pinton J-F, et al. High-Resolution  
440 Measurements of Face-to-Face Contact Patterns in a Primary School. *PLoS One*.  
441 2011;6(8):e23176.
- 442 12. BAG. COVID-19 - Recommandations sur la procédure à suivre pour les enfants  
443 symptomatiques de moins de 6 ans ainsi que les autres personnes fréquentant les écoles et  
444 les structures d'accueil parascolaire/extrafamilial et indications de test chez les enfants de  
445 moins de 6 ans [Internet]. 2021. Disponible sur:

- 446 [https://cdn.paediatrieschweiz.ch/production/uploads/2021/03/2021.03.23-Indications-de-  
test-chez-les-enfants-symptomatiques-de-moins-de-6-ans.pdf](https://cdn.paediatrieschweiz.ch/production/uploads/2021/03/2021.03.23-Indications-de-<br/>447 test-chez-les-enfants-symptomatiques-de-moins-de-6-ans.pdf)
- 448 13. Cevik M, Marcus JL, Buckee C, Smith TC. Severe Acute Respiratory Syndrome  
449 Coronavirus 2 (SARS-CoV-2) Transmission Dynamics Should Inform Policy. *Clinical  
450 Infectious Diseases*. 2021;73(Supplement\_2):S170-6.
- 451 14. Yung CF, Kam K, Nadua KD, Chong CY, Tan NWH, Li J, et al. Novel Coronavirus 2019  
452 Transmission Risk in Educational Settings. *Clinical Infectious Diseases*.  
453 2021;72(6):1055-8.
- 454 15. Nsoga MTN, Kronig I, Rodriguez FJP, Sattonnet-Roche P, Silva DD, Helbling J, et al.  
455 Diagnostic accuracy of Panbio rapid antigen tests on oropharyngeal swabs for detection of  
456 SARS-CoV-2. *PLOS ONE*. 2021;16(6):e0253321.
- 457 16. Swank Z, Michielin G, Yip HM, Cohen P, Andrey DO, Vuilleumier N, et al. A high-  
458 throughput microfluidic nanoimmunoassay for detecting anti-SARS-CoV-2 antibodies in  
459 serum or ultralow-volume blood samples. *Proc Natl Acad Sci USA*. 2021 May  
460 4;118(18):e2025289118
- 461 17. Althaus CL, Baggio S, Reichmuth ML, Hodcroft EB, Riou J, Neher RA, et al. A tale of two  
462 variants: Spread of SARS-CoV-2 variants Alpha in Geneva, Switzerland, and Beta in South  
463 Africa [Internet]. 2021 june. doi: <https://doi.org/10.1101/2021.06.10.21258468>
- 464 18. Ismail SA, Saliba V, Bernal JL, Ramsay ME, Ladhani SN. SARS-CoV-2 infection and  
465 transmission in educational settings: a prospective, cross-sectional analysis of infection  
466 clusters and outbreaks in England. *The Lancet Infectious Diseases*. 2021;21(3):344-53.
- 467 19. Meuris C, Kremer C, Geerinck A, Locquet M, Bruyère O, Defêche J, et al. Transmission  
468 of SARS-CoV-2 After COVID-19 Screening and Mitigation Measures for Primary School  
469 Children Attending School in Liège, Belgium. *JAMA Network Open*.  
470 2021;4(10):e2128757.
- 471 20. Ladhani SN, Baawuah F, Beckmann J, Okike IO, Ahmad S, Garstang J, et al. SARS-CoV-  
472 2 infection and transmission in primary schools in England in June–December, 2020  
473 (sKIDs): an active, prospective surveillance study. *The Lancet Child & Adolescent Health*.  
474 2021;5(6):417-27.
- 475 21. Paul LA, Daneman N, Schwartz KL, Science M, Brown KA, Whelan M, et al. Association  
476 of Age and Pediatric Household Transmission of SARS-CoV-2 Infection. *JAMA Pediatr*.  
477 2021;175(11):1151–1158.
- 478 22. Ghinai I, Woods S, Ritger KA, McPherson TD, Black SR, Sparrow L, et al. Community  
479 Transmission of SARS-CoV-2 at Two Family Gatherings — Chicago, Illinois, February–  
480 March 2020. *MMWR Morb Mortal Wkly Rep*. 2020;69(15):446-50.
- 481 23. Kriemler S, Ulyte A, Ammann P, Peralta GP, Berger C, Puhan MA, et al. Surveillance of  
482 Acute SARS-CoV-2 Infections in School Children and Point-Prevalence During a Time of  
483 High Community Transmission in Switzerland. *Front Pediatr*. 2021;9:645577.

- 484 24. L’Huillier AG, Lacour M, Sadiku D, Gadiri MA, De Siebenthal L, Schibler M, et al.  
485 Diagnostic Accuracy of SARS-CoV-2 Rapid Antigen Detection Testing in Symptomatic  
486 and Asymptomatic Children in the Clinical Setting. *J Clin Microbiol.* 59(9):e00991-21.
- 487 25. Posfay-Barbe KM, Andrey DO, Virzi J, Cohen P, Pigny F, Goncalves AR, et al. Prevalence  
488 of IgG against SARS-CoV-2 and evaluation of a rapid MEDsan IgG test in children seeking  
489 medical care. *Clin Infect Dis.* 2020;ciaa1702.
- 490 26. Villani A, Coltella L, Ranno S, Bianchi di Castelbianco F, Murru PM, Sonnino R, et al.  
491 School in Italy: a safe place for children and adolescents. *Ital J Pediatr.* 2021;47:23.
- 492 27. Varma JK, Thamkittikasem J, Whittemore K, Alexander M, Stephens DH, Arslanian K, et  
493 al. COVID-19 Infections Among Students and Staff in New York City Public Schools.  
494 *Pediatrics* (2021) 147 (5): e2021050605.
- 495 28. Hommes F, van Loon W, Thielecke M, Abramovich I, Lieber S, Hammerich R, et al.  
496 SARS-CoV-2 Infection, Risk Perception, Behaviour, and Preventive Measures at Schools  
497 in Berlin, Germany, during the Early Post-Lockdown Phase: A Cross-Sectional Study. *Int*  
498 *J Environ Res Public Health.* 2021;18(5):2739.
- 499 29. Fontanet A, Tondeur L, Grant R, Temmam S, Madec Y, Bigot T, et al. SARS-CoV-2  
500 infection in schools in a northern French city: a retrospective serological cohort study in an  
501 area of high transmission, France, January to April 2020. *Eurosurveillance.*  
502 2021;26(15):2001695.
- 503 30. Dattner I, Goldberg Y, Katriel G, Yaari R, Gal N, Miron Y, et al. The role of children in  
504 the spread of COVID-19: Using household data from Bnei Brak, Israel, to estimate the  
505 relative susceptibility and infectivity of children. *PLoS Comput Biol.*  
506 2021;17(2):e1008559.
- 507 31. Stein-Zamir C, Abramson N, Shoob H, Libal E, Bitan M, Cardash T, et al. A large COVID-  
508 19 outbreak in a high school 10 days after schools’ reopening, Israel, May 2020.  
509 *Eurosurveillance.* 2020;25(29):2001352.
- 510 32. Torres JP, Piñera C, De La Maza V, Lagomarcino AJ, Simian D, Torres B, et al. SARS-  
511 CoV-2 antibody prevalence in blood in a large school community subject to a Covid-19  
512 outbreak: a cross-sectional study. *Clin Infect Dis.* 2020;ciaa955.
- 513 33. Li B, Deng A, Li K, Hu Y, Li Z, Xiong Q, et al. Viral infection and transmission in a large,  
514 well-traced outbreak caused by the SARS-CoV-2 Delta variant [Internet]. 2021 july. doi:  
515 <https://doi.org/10.1101/2021.07.07.21260122>

516

517

518

519

520 Table 1: Overview of tests results, symptoms and cases among the 4 investigated classes,  
 521 teachers and non-teaching staff

|                    | Visit 1 (D0-2) |                    | Visit 2 (D5-7) <sup>a</sup> |          | Seroconversion (D30) <sup>b</sup> | Symptoms <sup>c</sup> | Total cases <sup>d</sup> |
|--------------------|----------------|--------------------|-----------------------------|----------|-----------------------------------|-----------------------|--------------------------|
|                    | RDT +          | RT-PCR +           | RDT +                       | RT-PCR + |                                   |                       |                          |
| Class A            | 1/17           | 8 <sup>e</sup> /21 | 0/1                         | 1/16     | 4/11                              | 10/13                 | 13/21                    |
| Class B            | -/-            | 2/17               | -/-                         | 0/15     | 0/12                              | 1/2                   | 2/19                     |
| Class C            | 0/1            | 1/17               | 0/14                        | 0/2      | 2/16 <sup>f</sup>                 | 0/3                   | 3/18                     |
| Class D            | -/-            | 0/15               | 0/12                        | 0/1      | 2/10                              | 1/2 <sup>g</sup>      | 2/15                     |
| Teachers           | 0/4            | 2/9                | 0/2                         | 0/3      | 0/7                               | 2/2                   | 2/9                      |
| Non-teaching staff | 0/2            | 0/10               | 0/4                         | 0/2      | 0/10                              | -/-                   | 0/13                     |

522 <sup>a</sup> Tests were not repeated in participants with a SARS-CoV-2 infection diagnosed at Visit 1

523 <sup>b</sup> Among participants with negative swab tests both at Visit 1 and Visit 2, and negative serology at baseline and/or  
 524 at Visit 1. Adults who were vaccinated and developed antibodies between visit 1 and visit 3 were not considered  
 525 as related to the outbreak.

526 <sup>c</sup> Among participants with a SARS-CoV-2 positive test and/or a seroconversion

527 <sup>d</sup> A case was defined as a participant with a positive RDT and/or a positive RT-PCR and/or a seroconversion.

528 <sup>e</sup> Including confirmation of one positive RDT by a subsequent RT-PCR performed on the same day

529 <sup>f</sup> Including 1 seroconversion between March 26, 2021 and May 11, 2021

530 <sup>g</sup> No data on symptoms for one child

531

532

533

534

535

536

537

538

539

540

541

542

543

544

545

546

547

548 **List of figures:**

549 **Figure 1: Timeline of symptoms onset, diagnosis and virological analyses among cases**  
550 **with a confirmed SARS-CoV-2 infection (positive RDT, RT-PCR or seroconversion)**

551 Legend: Apr: April, HAx: Adult member of household, HCx: Child member of household, Jun:  
552 June, Kx: Kid x, Tx: Teacher x, RDT: antigen rapid diagnostic test, RT-PCR: real-time reverse  
553 transcription polymerase chain reaction

554

555 **Figure 2: Results of serological tests at baseline, at D0-2 and D30 for all pupils, teachers,**  
556 **non-teaching staff and household members included in the outbreak investigation**

557 Legend: This figure displays the results of the serological tests performed at baseline (black  
558 square), i.e. at the beginning of the study in March 2021, and during the outbreak investigation  
559 at Day 0-2 (blue circle) and Day 30 (red diamond). Adults who were vaccinated during the  
560 outbreak investigation are indicated by a yellow diamond. Household members who had no  
561 serological test are not represented.

562 D: Day, HAx: Adult member of household, HCx: Child member of household, Kx: Kid x, Tx:  
563 Teacher x, PCR: real-time reverse transcription polymerase chain reaction

564

565 **Figure 3: Virological analysis of positive cases by SARS-CoV-2 full genome sequencing**

566 ID: Identifier, GISAID: Global Initiative on Sharing Avian Influenza Data, Kx: Kid x, Tx:  
567 Teacher x

568 Legend: Mutations in comparison to the reference sequence (NC\_045512) are highlighted in  
569 orange. Green fields indicate no mutation; grey fields indicate insufficient genome coverage;  
570 and yellow fields indicate mixed viral population of the two nucleotides given. Numbers  
571 indicate nucleotide positions; asterisks (\*) mark lineage-defining mutations for the Alpha  
572 variant.

573

574

575

576

577

578

579

580

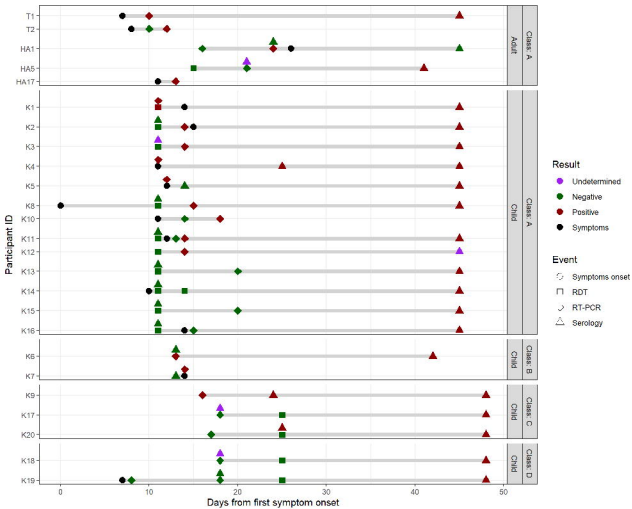

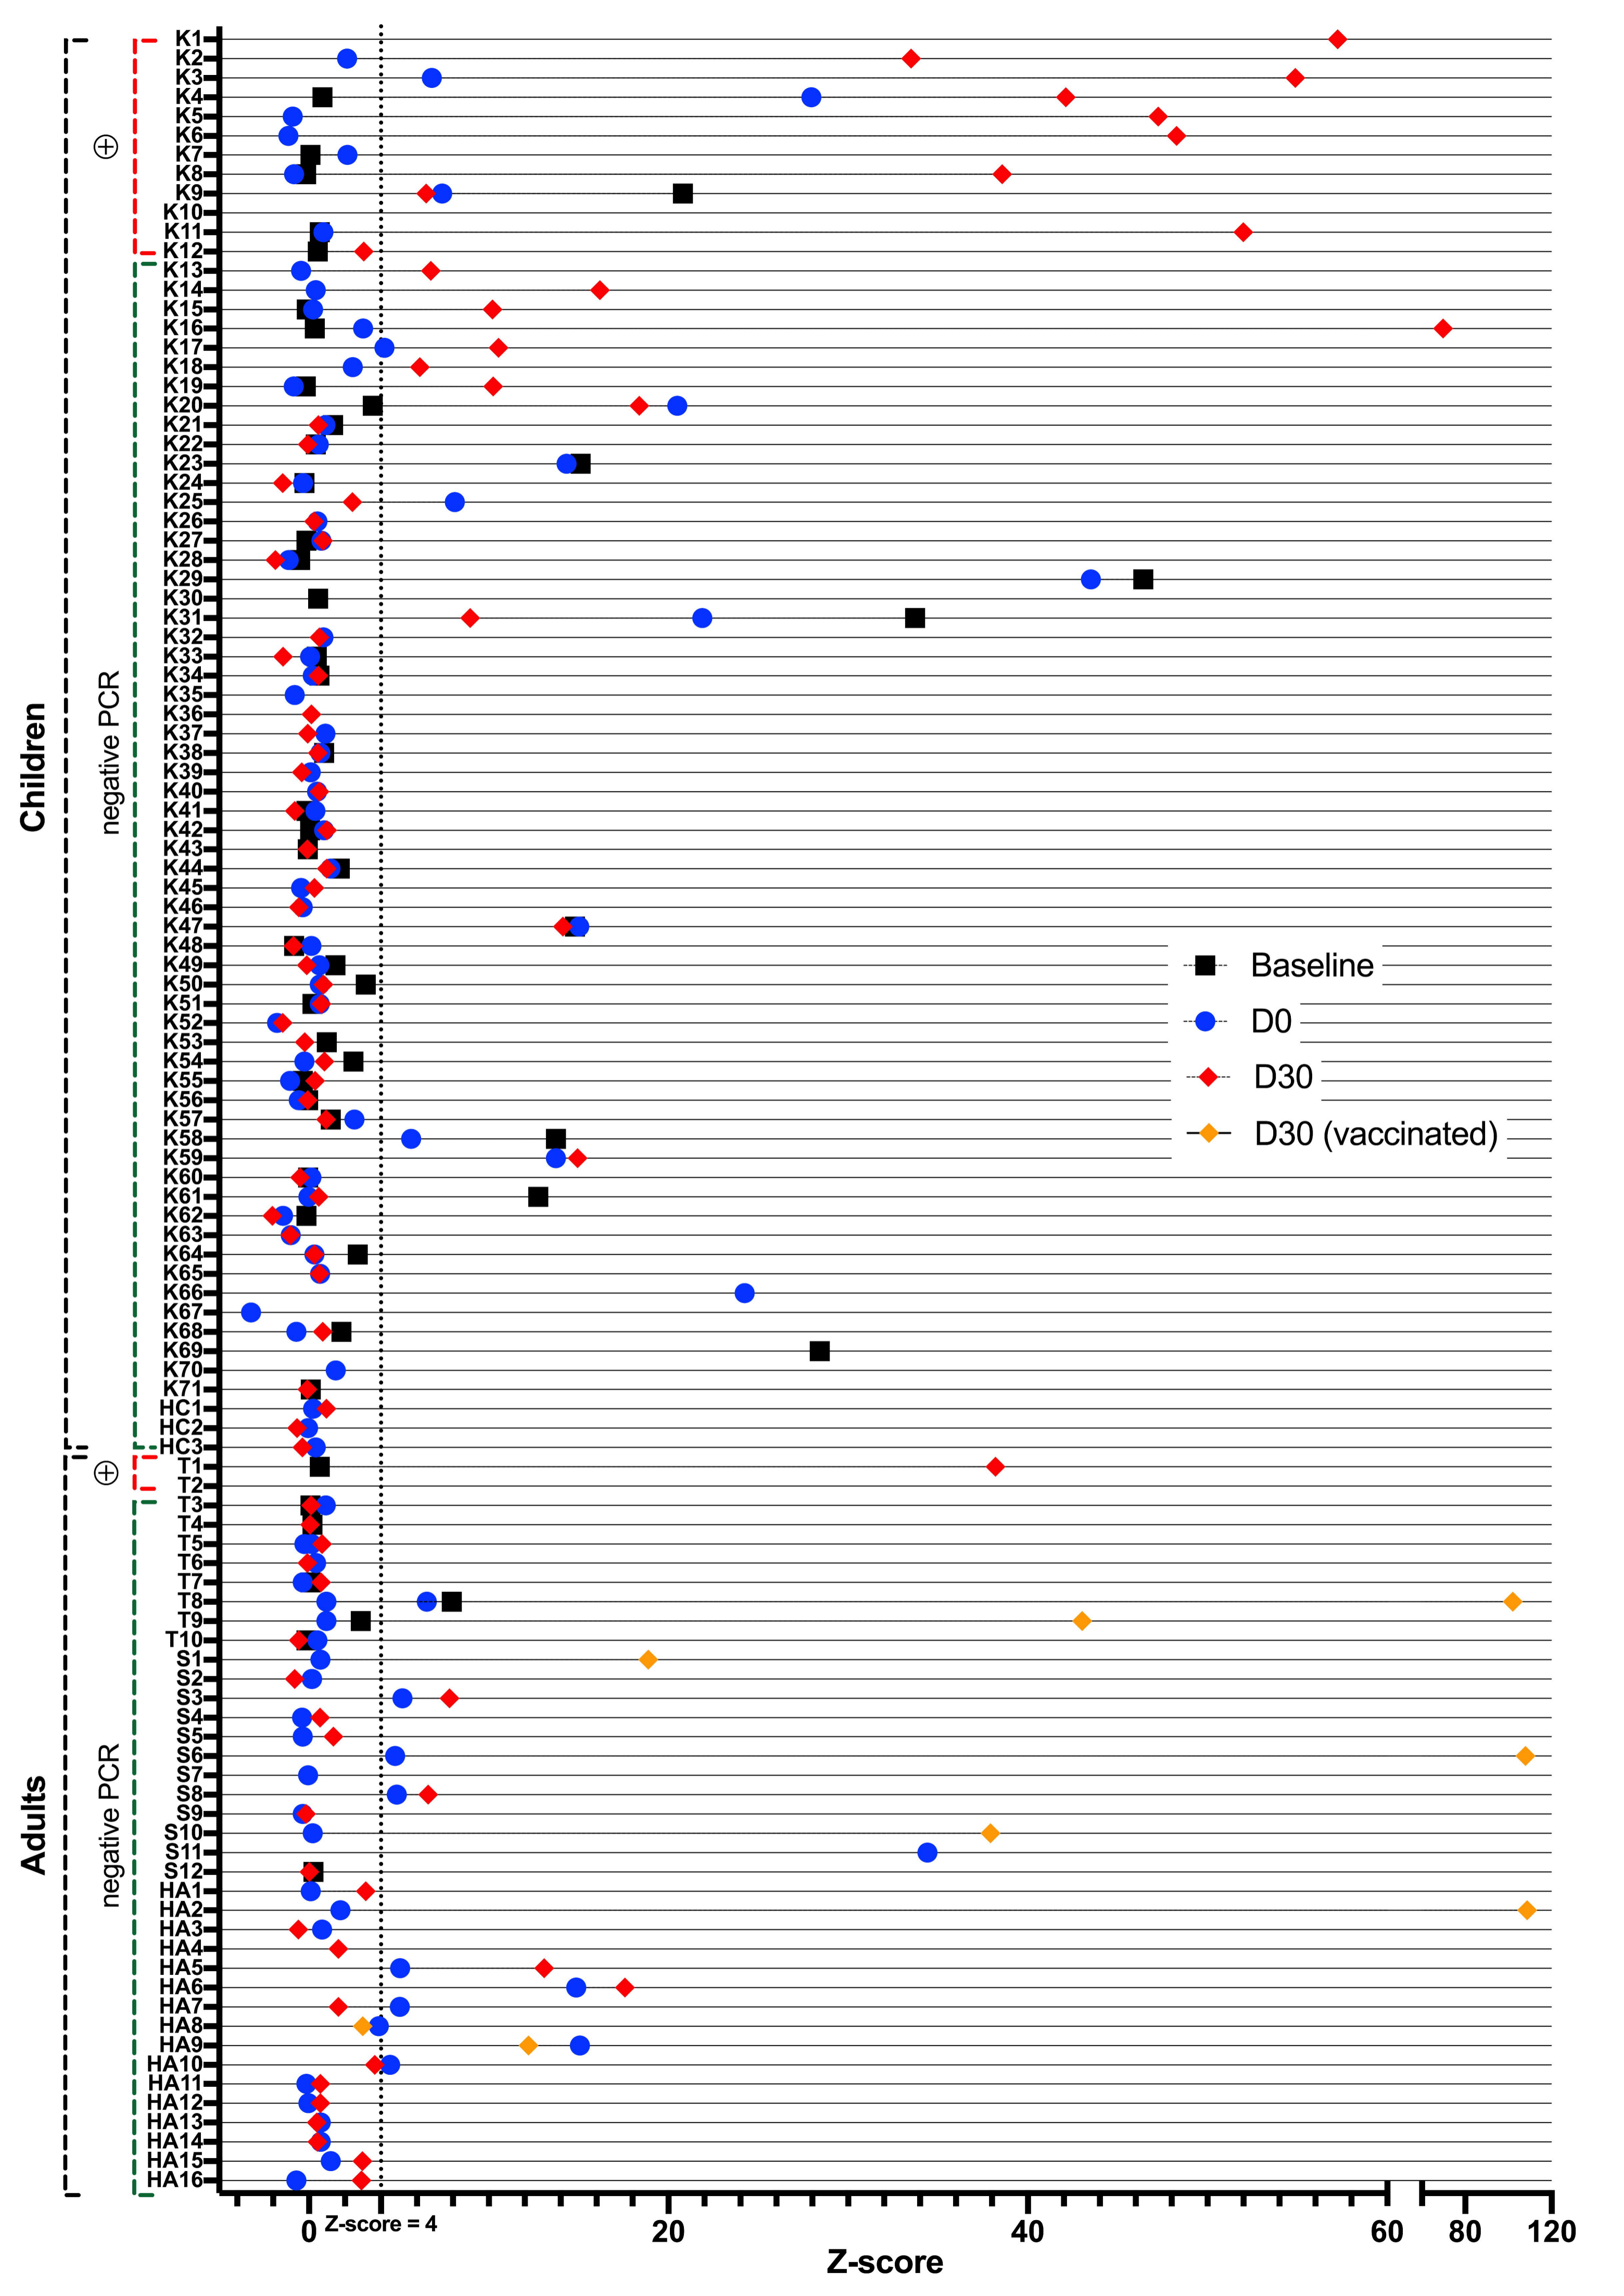

| Study ID | GSAD Accession ID | Coverage | DMP Lab |     |     |     |     |     |     |     |     |     |     |     |     |     | Spine |     |     |     |     |     |     | DMP1a |     |     | DMP1b |     |     | N   |     |     |     |     |     |     |     |     |     |     |     |     |     |   |   |   |   |   |   |   |   |   |   |
|----------|-------------------|----------|---------|-----|-----|-----|-----|-----|-----|-----|-----|-----|-----|-----|-----|-----|-------|-----|-----|-----|-----|-----|-----|-------|-----|-----|-------|-----|-----|-----|-----|-----|-----|-----|-----|-----|-----|-----|-----|-----|-----|-----|-----|---|---|---|---|---|---|---|---|---|---|
|          |                   |          | 141     | 142 | 143 | 144 | 145 | 146 | 147 | 148 | 149 | 150 | 151 | 152 | 153 | 154 | 155   | 156 | 157 | 158 | 159 | 160 | 161 | 162   | 163 | 164 | 165   | 166 | 167 | 168 | 169 | 170 | 171 | 172 | 173 | 174 | 175 | 176 | 177 | 178 | 179 | 180 |     |   |   |   |   |   |   |   |   |   |   |
| 71       | HP_P0_146215      | 100%     | T       | T   | G   | T   | T   | T   | A   | T   | T   | C   | T   | T   | del | T   | T     | T   | C   | T   | C   | T   | G   | A     | C   | G   | C     | del | del | T   | A   | G   | A   | T   | G   | C   | A   | T   | T   | T   | G   | del | C   | T | A | A | A | C | C | T |   |   |   |
| 72       | CP_ISL_1101905    | 100%     | T       | T   | G   | T   | T   | T   | A   | T   | T   | C   | T   | T   | del | T   | T     | T   | C   | T   | C   | T   | G   | A     | C   | G   | C     | del | del | T   | A   | G   | A   | T   | G   | C   | A   | T   | T   | T   | G   | del | C   | T | A | A | A | C | C | T |   |   |   |
| 81       | HP_P0_146216      | 100%     | T       | T   | G   | T   | T   | T   | A   | T   | T   | C   | T   | T   | del | T   | T     | T   | C   | T   | C   | T   | G   | A     | C   | G   | C     | del | del | T   | A   | G   | A   | T   | G   | C   | A   | T   | T   | T   | G   | del | C   | T | A | A | A | C | C | T |   |   |   |
| 82       | CP_ISL_1462257    | 99%      | T       | T   | G   | T   | T   | T   | A   | T   | T   | C   | T   | T   | del | T   | T     | T   | C   | T   | C   | T   | G   | A     | C   | G   | C     | del | del | T   | A   | G   | A   | T   | G   | C   | A   | T   | T   | T   | G   | del | C   | T | A | A | A | C | C | T |   |   |   |
| 84       | HP_P0_1462490     | 97%      | T       | T   | GT  | T   | T   | T   | A   | T   | T   | C   | T   | T   | del | T   |       | T   |     | T   | C   | T   | G   | A     | C   | G   | C     | del | del |     | A   | G   | A   | T   | G   | C   |     |     | T   | T   | T   | G   | del | C | T | A | A | A | C | C | T |   |   |
| 85       | CP_ISL_1462313    | 99%      | T       | T   | G   | T   | T   | T   | A   | T   | T   | C   | T   | T   | del | T   | T     | T   | C   | T   | C   | T   | G   | A     | C   | G   | C     | del | del | T   | A   | G   | A   | T   | G   | C   | A   | T   | T   | T   | G   | del | C   | T | A | A | A | C | C | T |   |   |   |
| 86       | HP_P0_1462506     | 100%     | T       | T   | G   | T   | T   | T   | A   | T   | T   | C   | T   | T   | del | T   | T     | T   | C   | T   | C   | T   | G   | A     | C   | G   | C     | del | del | T   | A   | G   | A   | T   | G   | C   | A   | T   | T   | T   | G   | del | C   | T | A | A | A | C | C | T |   |   |   |
| 88       | CP_ISL_1462331    | 100%     | T       | T   | G   | T   | T   | T   | A   | T   | T   | C   | T   | T   | del | T   | T     | T   | C   | T   | C   | T   | G   | A     | C   | G   | C     | del | del | T   | A   | G   | A   | T   | G   | C   | A   | T   | T   | T   | G   | del | C   | T | A | A | A | C | C | T |   |   |   |
| 87       | HP_P0_1462447     | 100%     | T       | T   | G   | T   | T   | T   | A   | T   | T   | C   | T   | T   | del | T   | T     | T   | C   | T   | C   | T   | G   | A     | C   | G   | C     | del | del | T   | A   | G   | A   | T   | G   | C   | A   | T   | T   | T   | G   | del | C   | T | A | A | A | C | C | T |   |   |   |
| 88       | HP_P0_1462448     | 97%      | T       | T   | G   | T   | T   | T   | A   | T   | T   | C   | T   | T   | del | T   | T     | T   | C   | T   | C   | T   | G   | A     | C   | G   | C     | del | del | T   | A   | G   | A   | T   | G   | C   | A   | T   | T   | T   | G   | del | C   | T | A | A | A | C | C | T |   |   |   |
| 911      | CP_ISL_1462445    | 72%      |         | T   | G   | T   |     | T   | A   | T   | T   | C   |     | T   | del |     | T     |     | C   | T   | C   | T   | G   | A     | C   | G   | C     | del | del | T   | A   | G   |     |     | G   | C   |     |     |     |     |     |     |     |   | A | A | C | C | T |   |   |   |   |
| 912      | HP_P0_1462447     | 97%      | T       |     |     | T   | T   |     |     |     |     | C   |     |     | del | T   | T     | T   | C   | T   | T   | G   | A   | C     | G   | C   | del   | del | T   | A   | G   | A   | T   | G   | C   |     |     |     |     |     |     |     |     |   |   |   |   | A | A | A | C | C | T |
